# Supplementary material for: Acidic ionic liquid based UiO-67 type MOFs: a stable and efficient heterogeneous catalyst for esterification
Source: Royal Society of Chemistry journal article supplement (doi:10.1039/c8ra01119b), 2018-01-01
Supplement: c8ra01119b1.pdf [file c8ra01119b1.pdf]

## Supporting information

**Acidic ionic liquid based UiO-67 type MOF: a stable and efficient heterogeneous catalyst for esterification**

**Zichen Xu,<sup>a,b</sup> Guoying Zhao,<sup>\*a</sup> Latif Ullah,<sup>a</sup> Meng Wang,<sup>a</sup> Aoyun Wang,<sup>a</sup> Yanqiang Zhang,<sup>a,c</sup> and Suojiang Zhang<sup>\*a</sup>**

<sup>a</sup>CAS Key Laboratory of Green Process and Engineering, State Key Laboratory of Multiphase Complex System, Beijing Key Laboratory of Ionic Liquids Clean Process, Institute of Process Engineering, Chinese Academy of Sciences, Beijing, 100190, China.

<sup>b</sup>University of Chinese Academy of Sciences, Beijing 100049, China.

<sup>c</sup> Zhengzhou Institute of Emerging Industrial Technology, Zhengzhou, Henan 450003, China

Email: *sjzhang@ipe.ac.cn, gyzhao@ipe.ac.cn.*

Fax: +86-010-82544875, Tel: +86 10 82544875.

## The content of the supporting information:

### NMR Spectroscopic Data for hexafluoroisopropyl sulfuric acid

$^1\text{H}$  NMR (600 MHz, neat):  $\delta$ = 10.17 (s, 1H), 5.14 (sep, J = 5.0 Hz, 1H).

$^{13}\text{C}$  NMR (151 MHz, neat):  $\delta$ = 118.59 (q, J = 282.4 Hz), 73.96 (hept, J = 36.5 Hz).

$^{19}\text{F}$  NMR (565 MHz, neat):  $\delta$ = -75.79.

The hexafluoroisopropoxy sulfuric acid was measured as a neat compound.

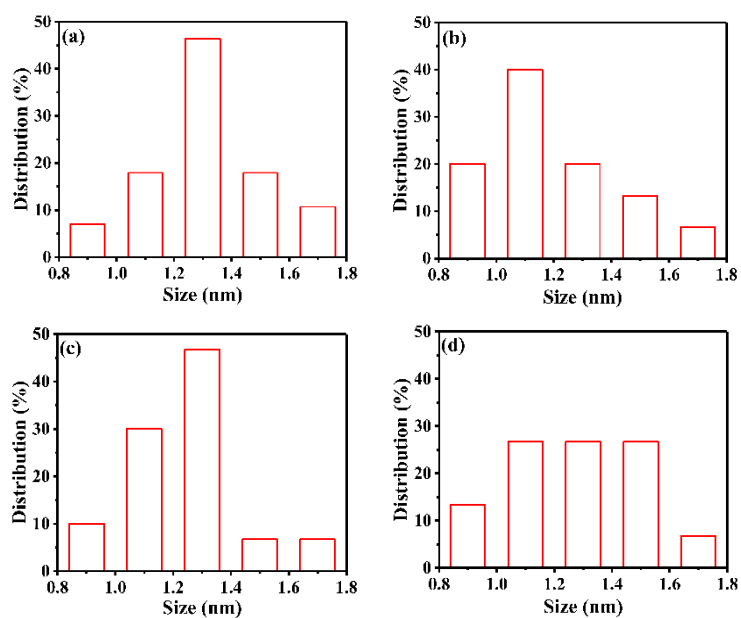

**Fig. S1** Particle size distribution of the prepared catalysts. (a) the pristine UiO-67-bpy, (b) UiO-67-HSO<sub>4</sub>, (c) UiO-67-CF<sub>3</sub>SO<sub>3</sub>, (d) UiO-67-hifpOSO<sub>3</sub>.

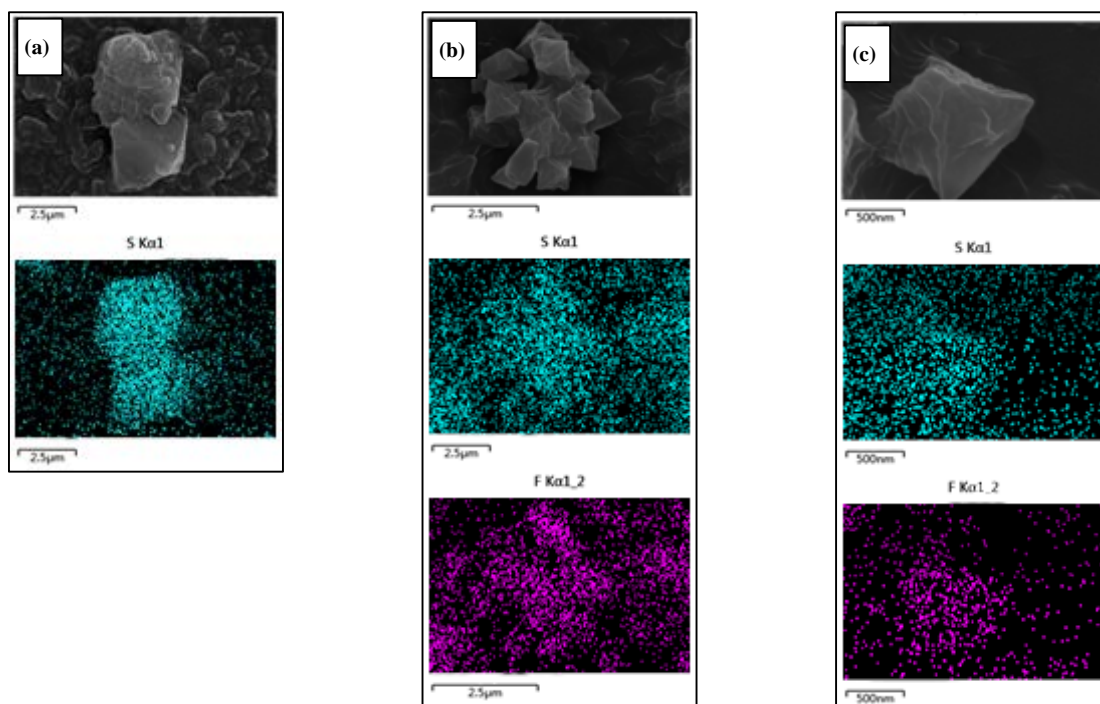

**Fig. S2** EDS elemental mapping of S and F in the prepared catalysts. (a) UiO-67-HSO<sub>4</sub>, (b) UiO-67-CF<sub>3</sub>SO<sub>3</sub>, (c) UiO-67-hifpOSO<sub>3</sub>.

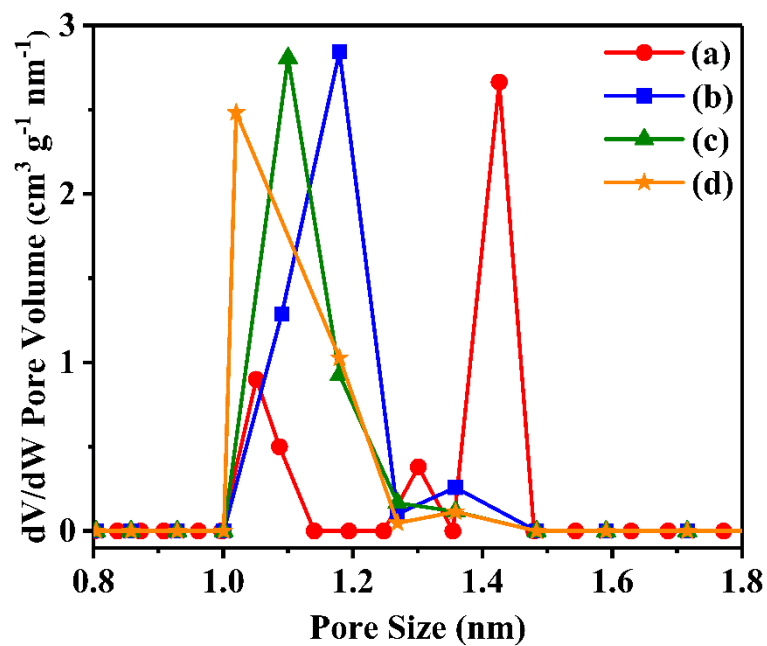

**Fig. S3** Pore size distribution of the prepared catalysts. (a) the pristine UiO-67-bpy, (b) UiO-67-HSO<sub>4</sub>, (c) UiO-67-CF<sub>3</sub>SO<sub>3</sub>, (d) UiO-67-hifpOSO<sub>3</sub>.

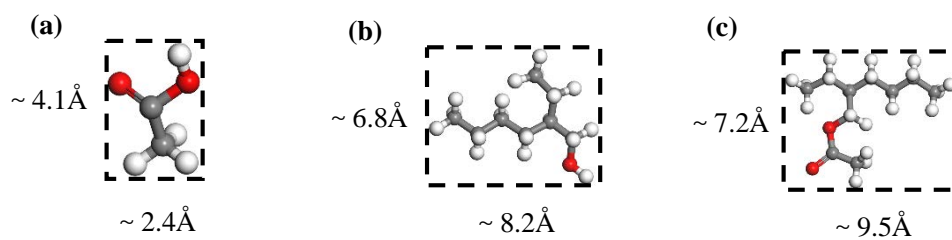

**Fig. S4** Optimized geometric structures of (a) acetic acid, (b) isooctyl alcohol and (c) isooctyl acetate.

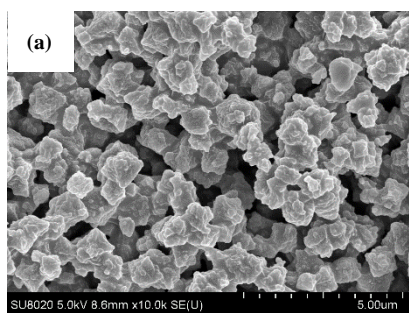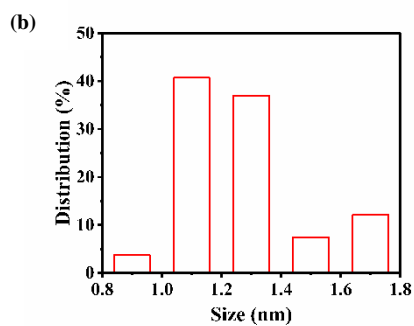

**Fig. S5** Recovered results of the UiO-67-CF<sub>3</sub>SO<sub>3</sub> catalyst. (a) SEM image, (b) particles size distribution.
